# Supplementary material for: Neuropathological Characterization of Dolphin Morbillivirus Infection in Cetaceans Stranded in Italy
Source: MDPI journal article supplement (doi:10.3390/ani12040452), 2022-02-12
Supplement: s1 [file s1]

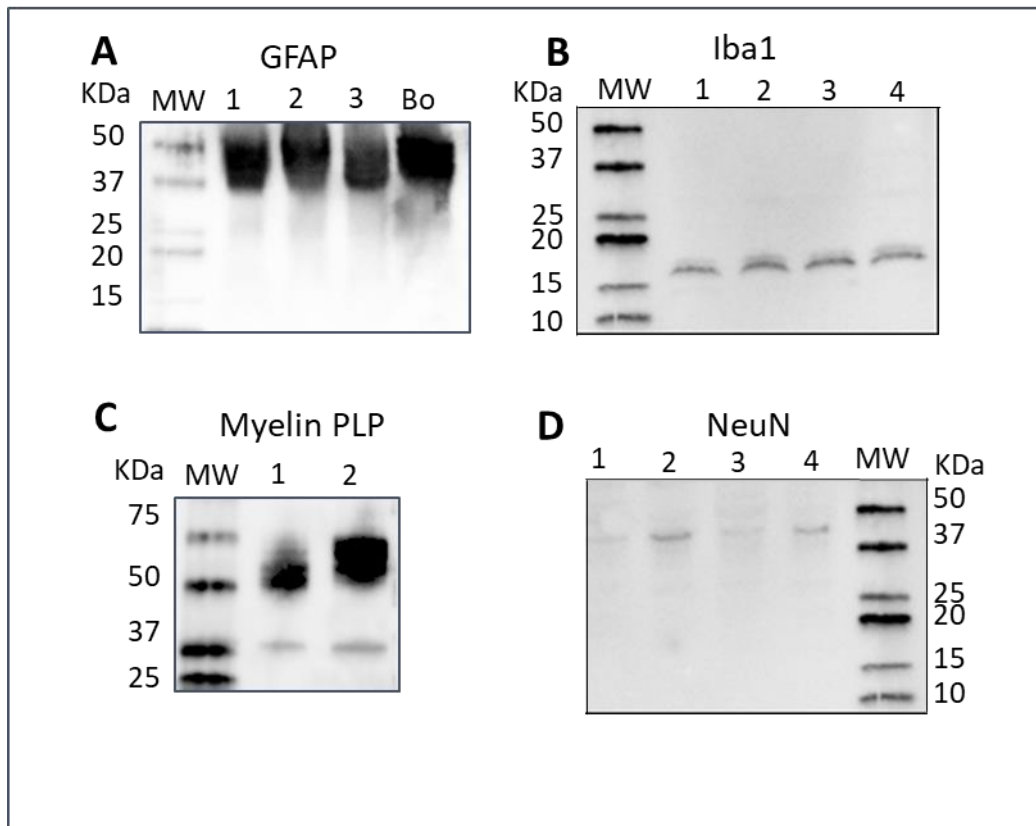

**Supplementary material Figure S1.** Figure S1. Western Blot to evaluate specific reactivity of different polyclonal antibodies against *Stenella coeruleoalba*.

Central nervous system (CNS) specimens from *Stenella coeruleoalba* (lanes 1, 2, 3 and 4) or *Bos taurus* (lane Bo) were homogenized at 10% weight/volume and subjected to immunoblotting. Twenty to forty  $\mu$ g of total protein for each sample were reduced, loaded on Mini-PROTEAN TGX 4-20% Gels (#456-1094, Biorad) and separated electrophoretically in XT MES running Buffer 1X (Biorad) for about 50 minutes at 150V using the MiniPROTEANII electrophoretic chamber (Biorad). The proteins transfer was obtained with a voltage of 25 V for 5 minutes using the semi-dry Trans-Blot-Turbo (Biorad) transfer system according to the manufacturer's protocols. Detection of proteins was carried out respectively with: **A)** anti-cow GFAP polyclonal antibody (1:10000 over night, DAKO#Z0334, predicted molecular weight  $\approx$  50 Kda); **B)** anti-Iba1 polyclonal antibody (1:2500 over night, Biocare Med.#CP290, predicted molecular weight  $\approx$  16.7 Kda; **C)** anti-myelin PLP polyclonal antibody (1:2500 over night, abcam#ab28486, predicted molecular weight  $\approx$  35 Kda + isoforms/duplicates from literature); **D)** anti-NeuN polyclonal antibody (1:2500 over night, Abcam#ab104225, predicted molecular weight  $\approx$  48 KDa).

Membranes were incubated with a 1:5000 dilution of the HRP-Goat anti-Rabbit antibody (Invitrogen # 656120) and with 1 ml of the combined 1:1 solution of the Clarity™ Western ECL Substrate detection kit (Biorad). Finally, membranes were acquired in chemiluminescence using the ChemiDoc™ Touch (Biorad), image acquisition system or equivalent system. MW, molecular size markers (in kilodaltons). The data are representative of multiple immunoblots of these specimens.

**Supplementary material Table S1.** Anamnestic and stranding data of thirty-one animals under study

| ID<br>Case | Ref. Lab   | Species                      | DCC | NS       | Sex | Age               | SL                        | SD         |
|------------|------------|------------------------------|-----|----------|-----|-------------------|---------------------------|------------|
| 1          | 123517/08  | <i>Stenella coeluleoalba</i> | 2   | Poor     | M   | Adult             | Laigueglia (SV)           | 24/10/2008 |
| 2          | 80729/2/11 | <i>Stenella coeluleoalba</i> | 2   | good     | M   | Juvenile-Subadult | Eboli (SA)                | 16/07/2011 |
| 3          | 10331/12   | <i>Stenella coeluleoalba</i> | 3   | Good     | M   | Juvenile-Subadult | Ospedaletti (IM)          | 24/01/2012 |
| 4          | 42303/13   | <i>Stenella coeluleoalba</i> | 3   | Poor     | M   | Juvenile-Subadult | S. Lucido (CS)            | 03/04/2013 |
| 5          | 71891/14   | <i>Stenella coeluleoalba</i> | 3   | Good     | M   | Juvenile-Subadult | S.Giovanni a Piro<br>(SA) | 29/07/2014 |
| 6          | 3908/15    | <i>Stenella coeluleoalba</i> | 2   | Good     | F   | Adult             | Imperia                   | 16/01/2015 |
| 7          | 80677/16   | <i>Stenella coeruleoalba</i> | 2   | Poor     | F   | Juvenile-Subadult | Eraclea Minoa<br>(AG)     | 21/08/2016 |
| 8          | 10475/17   | <i>Stenella coeruleoalba</i> | 3   | Good     | F   | Juvenile-Subadult | Riposto (CT)              | 19/09/2016 |
| 9          | 10477/17   | <i>Stenella coeruleoalba</i> | 2   | Poor     | F   | Juvenile-Subadult | Ispica (RG)               | 30/09/2016 |
| 10         | 92300/16   | <i>Stenella coeruleoalba</i> | 2   | Poor     | M   | Juvenile-Subadult | Porto Cesareo<br>(LE)     | 07/10/2016 |
| 11         | 95842/16   | <i>Stenella coeruleoalba</i> | 2   | Poor     | M   | Juvenile-Subadult | Genova                    | 20/11/2016 |
| 12         | 6023/17    | <i>Stenella coeruleoalba</i> | 2   | Poor     | M   | Adult             | Otranto (LE)              | 29/11/2016 |
| 13         | 6020/17    | <i>Stenella coeruleoalba</i> | 2   | Poor     | M   | Juvenile-Subadult | Torricella (TA)           | 21/12/2016 |
| 14         | 16769/17   | <i>Stenella coeruleoalba</i> | 2   | Moderate | M   | Juvenile-Subadult | Savona                    | 16/02/2017 |
| 15         | 26823/17   | <i>Stenella coeruleoalba</i> | 3   | Moderate | F   | Juvenile-Subadult | Prino (IM)                | 09/03/2017 |
| 16         | 78983/17   | <i>Stenella coeruleoalba</i> | 2   | Poor     | F   | Adult             | Savona                    | 14/09/2017 |
| 17         | 106163/17  | <i>Stenella coeruleoalba</i> | 2   | Poor     | M   | Adult             | Alassio (SV)              | 01/12/2017 |
| 18         | 2926/18    | <i>Stenella coeruleoalba</i> | 2   | Moderate | M   | Juvenile-Subadult | Imperia                   | 13/01/2018 |
| 19         | 41779/18   | <i>Stenella coeruleoalba</i> | 1   | Poor     | M   | Adult             | Schiavonea (CZ)           | 18/04/2018 |
| 20         | 62728/18   | <i>Stenella coeruleoalba</i> | 2   | Poor     | M   | Adult             | Bivona (VV)               | 27/06/2018 |

| ID Case | Ref. Lab  | Species                      | DCC | NS       | Sex | Age               | SL                   | SD         |
|---------|-----------|------------------------------|-----|----------|-----|-------------------|----------------------|------------|
| 21      | 87558/18  | <i>Stenella coeruleoalba</i> | 2   | Moderate | F   | Juvenile-Subadult | Arenzano (GE)        | 29/10/2018 |
| 22      | 100927/18 | <i>Stenella coeruleoalba</i> | 1   | Good     | M   | Adult             | Centofontane (CZ)    | 19/11/2018 |
| 23      | 619/19    | <i>Stenella coeruleoalba</i> | 2   | Poor     | M   | Adult             | Alassio (SV)         | 03/01/2019 |
| 24      | 9553/19   | <i>Stenella coeruleoalba</i> | 1   | Good     | F   | Juvenile-Subadult | Nicotera (VV)        | 09/01/2019 |
| 25      | 23352/19  | <i>Stenella coeruleoalba</i> | 2   | Poor     | F   | Adult             | Ispani (SA)          | 27/01/2019 |
| 26      | 25089/19  | <i>Stenella coeruleoalba</i> | 2   | Moderate | M   | Juvenile-Subadult | Palmi (RC)           | 29/01/2019 |
| 27      | 23336/19  | <i>Stenella coeruleoalba</i> | 3   | Poor     | M   | Adult             | Torre del Greco (NA) | 08/02/2019 |
| 28      | 21724/19  | <i>Stenella coeruleoalba</i> | 2   | Good     | F   | Adult             | Savona               | 05/03/2019 |
| 29      | 12060/20  | <i>Stenella coeruleoalba</i> | 3   | Good     | F   | Adult             | Mondragone (CE)      | 03/04/2019 |
| 30      | 59260/19  | <i>Tursiops truncatus</i>    | 2   | Moderate | M   | Adult             | Genova               | 04/07/2019 |
| 31      | 38375/20  | <i>Tursiops truncatus</i>    | 3   | Good     | M   | Juvenile-Subadult | Parghelia (VV)       | 22/04/2020 |

Legend: ID: identification; Ref. lab: Laboratorial reference; DCC: decomposition conservation code; NS: nutritional status; F: female; M: male; SL: stranding location; SD: stranding date.

**Supplementary material Table S2.** Results of molecular, immunohistochemical, microbiological and serological investigations and type of infection of thirty-one animals under study

| ID case | DMV strain  | Disease type | PCR              |    | IHC                  |     | Bacteria | Sierology        |              |                  | References |                      |
|---------|-------------|--------------|------------------|----|----------------------|-----|----------|------------------|--------------|------------------|------------|----------------------|
|         |             |              | <i>T. gondii</i> | HV | <i>Brucella</i> spp. | CDV |          | <i>T. gondii</i> | CDV          | <i>T. gondii</i> |            | <i>Brucella</i> spp. |
| 1       | Med         | Systemic     | +                | -  | -                    | +   | +        | negative         | -            | 1:80 (serum)     | -          | [1,9,10,30,37]       |
| 2       | Med         | NA           | -                | -  | -                    | +   |          | negative         | NP           | NP               | NP         | [1,10]               |
| 3       | Med         | Systemic     | -                | -  | -                    | -   |          | negative         | -            | >1:160           | -          | [1,37]               |
| 4       | Med         | Systemic     | -                | -  | -                    | -   |          | negative         | -            | -                | -          | [1]                  |
| 5       | Med         | Systemic     | +                | -  | -                    | +   | -        | negative         | NP           | NP               | NP         | [1]                  |
| 6       | Med         | Systemic     | -                | -  | -                    | -   |          | negative         | 1:40 (serum) | 1:80 (serum)     | -          | [10]                 |
| 7       | NE-atlantic | Systemic     | -                | -  | -                    | +   |          | negative         | NP           | NP               | NP         |                      |
| 8       | NE-atlantic | Systemic     | -                | -  | -                    | +   |          | negative         | NP           | NP               | NP         |                      |
| 9       | NE-atlantic | Systemic     | -                | -  | -                    | +   |          | negative         | NP           | NP               | NP         |                      |

| ID case | DMV strain  | Disease type | PCR              |     | IHC                  |     | Bacteria                                              | Sierology       |                                        |                      | References |
|---------|-------------|--------------|------------------|-----|----------------------|-----|-------------------------------------------------------|-----------------|----------------------------------------|----------------------|------------|
|         |             |              | <i>T. gondii</i> | HV  | <i>Brucella</i> spp. | CDV |                                                       | CDV             | <i>T. gondii</i>                       | <i>Brucella</i> spp. |            |
| 10      | NE-atlantic | Systemic     | -                | -   | -                    | +   | <i>L. ivanovii</i>                                    | NP              | NP                                     | NP                   | [10,12]    |
| 11      | NE-atlantic | Systemic     | -                | vHV | -                    | +   | <i>Photobacterium damsela</i>                         | 1:40 (serum)    | >1:40 (serum)                          | -                    | [10,12]    |
| 12      | NE-atlantic | Systemic     | -                | -   | -                    | +   | negative                                              | NP              | NP                                     | NP                   | [10,12]    |
| 13      | NE-atlantic | Systemic     | -                | -   | -                    | -   | negative                                              | NP              | NP                                     | NP                   | [10,12]    |
| 14      | NE-atlantic | Systemic     | +                | -   | +                    | +   | <i>Brucella ceti</i><br><i>Photobacterium damsela</i> | 1:8 (serum)     | >1:40 (serum, CSF and aqueous humor )  | -                    | [28,29]    |
| 15      | NE-atlantic | Systemic     | -                | -   | -                    | +   | negative                                              | -               | >1:40 (serum)                          | -                    | [10]       |
| 16      | NE-atlantic | Systemic     | +                | -   | -                    | +   | <i>Salmonella</i> 1,4,[5],12:i:-, .                   | -               | IFAT >1:640 (serum and aqueous humor ) | -                    | [10,27]    |
| 17      | NE-atlantic | Systemic     | -                | -   | -                    | -   | negative                                              | >1: 256 (serum) | -                                      | -                    |            |
| 18      | NE-atlantic | Systemic     | -                | -   | -                    | -   | negative                                              | -               | -                                      | -                    |            |
| 19      | NE-atlantic | Systemic     | -                | -   | -                    | +   | negative                                              | NP              | NP                                     | NP                   |            |
| 20      |             | Systemic     | +                | vHV | -                    | +   | negative                                              | NP              | NP                                     | NP                   |            |

| ID case | DMV strain  | Disease type | PCR              |    | IHC                  |     | Bacteria         | Sierology                                               |                       |                                 | References |
|---------|-------------|--------------|------------------|----|----------------------|-----|------------------|---------------------------------------------------------|-----------------------|---------------------------------|------------|
|         |             |              | <i>T. gondii</i> | HV | <i>Brucella</i> spp. | CDV | <i>T. gondii</i> | CDV                                                     | <i>T. gondii</i>      | <i>Brucella</i> spp.            |            |
| 21      | NE-atlantic | Systemic     | -                | -  | -                    | +   |                  | <i>Photobacterium damsela</i> , <i>Listeria innocua</i> | NA                    | NA                              | NA         |
| 22      |             | Systemic     | -                | -  | -                    | +   |                  | negative                                                | NP                    | NP                              | NP         |
| 23      | NE-atlantic | Systemic     | -                | -  | -                    | +   |                  | negative                                                | -                     | -                               | -          |
| 24      | NE-atlantic | Systemic     | +                | -  | -                    | +   | +                | negative                                                | NP                    | NP                              | NP         |
| 25      | NE-atlantic | Systemic     | -                | -  | -                    | -   |                  | negative                                                | NP                    | NP                              | NP         |
| 26      | NE-atlantic | Systemic     | +                | -  | -                    | +   | +                | negative                                                | NP                    | NP                              | NP         |
| 27      | NE-atlantic | Systemic     | -                | -  | -                    | +   |                  | negative                                                | NP                    | NP                              | NP         |
| 28      | NE-atlantic | Systemic     | -                | -  | -                    | +   |                  | negative                                                | 1:128 (humor aqueous) | -                               | -          |
| 29      | NE-atlantic | Systemic     | +                | -  | -                    | +   | -                | negative                                                | NP                    | NP                              | NP         |
| 30      | NE-atlantic | Systemic     | +                | -  | -                    | +   | -                | <i>Photobacterium damsela</i>                           | -                     | >1:40 (serum and aqueous humor) | -          |
| 31      | NE-atlantic | Systemic     | -                | -  | -                    | +   |                  | <i>Photobacterium damsela</i>                           | NP                    | NP                              | NP         |

Legend: ID: identification; PCR: polymerase chain reaction; HV: Herpesvirus; IHC: immunohistochemistry; CDV: canine distemper virus; NE-Atlantic: Northeast Atlantic; Med: Mediterranean.

[1]: 10.7589/2017-02-035

[9]: 10.1038/s41598-018-19269-2

[10]: 10.1038/s41598-020-77835-z

[12]: 10.3354/dao03323

[27]: 10.1038/s41598-019-42474-6

[28]: 10.1371/journal.pone.0240178

[29]: 10.3390/ani11051201

[30]: 10.1556/004.2021.00028

[37]: 10.7589/2016-07-150
